# Supplementary material for: Comparative Genomics of Three Aspergillus Strains Reveals Insights into Endophytic Lifestyle and Endophyte-Induced Plant Growth Promotion
Source: MDPI journal article supplement (doi:10.3390/jof8070690), 2022-06-29
Supplement: s1 [file s1]

## Supplementary Figures

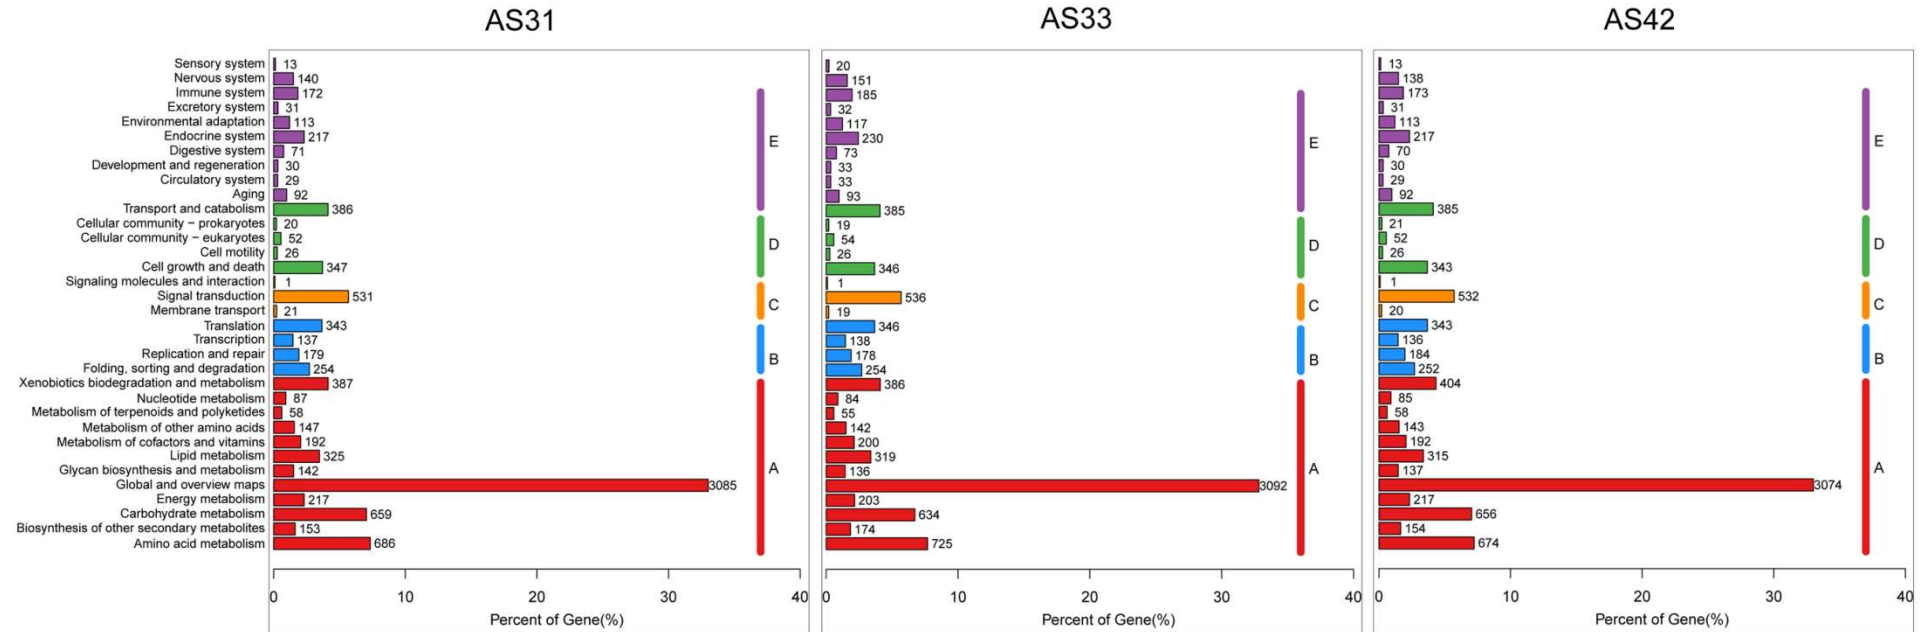

Figure S1. The classifications of genes of AS31, AS33, and AS42 based on KEGG categories. A, Metabolism; B, Genetic information processing; C, Environmental information processing; D, Cellular processes; E, Organismal systems.

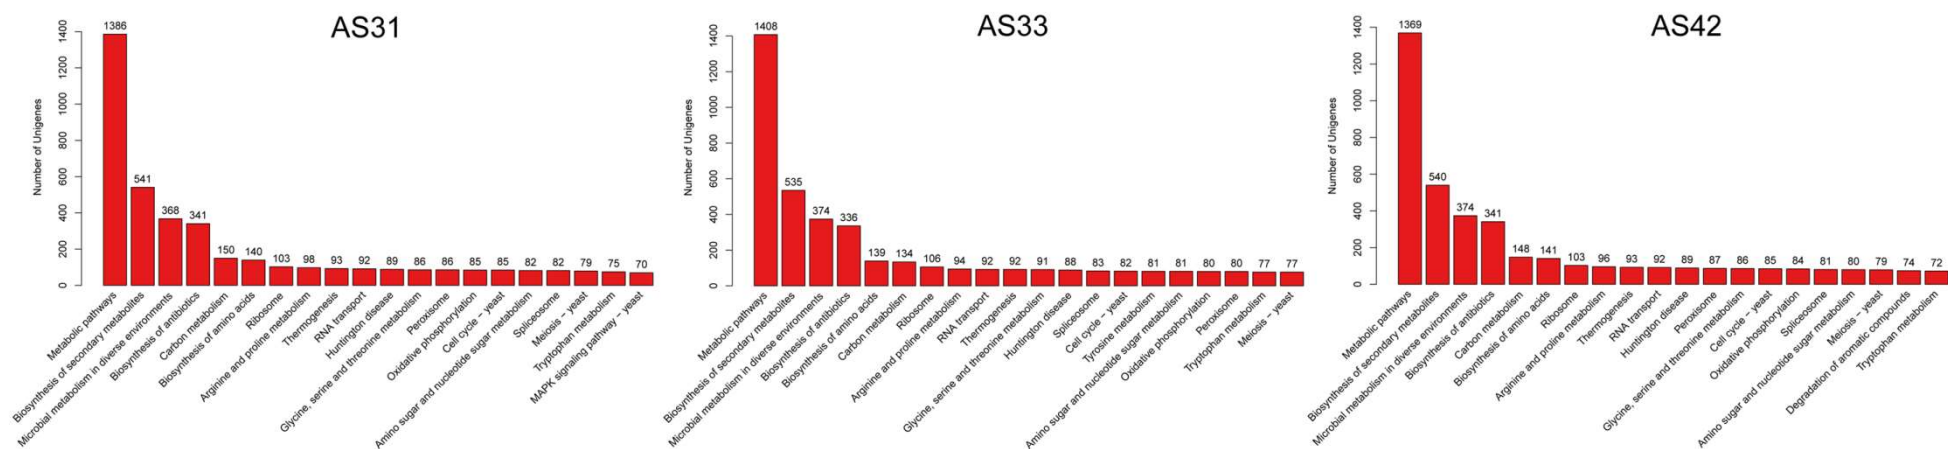

Figure S2. The top 20 KEGG pathways enriched in genomes of AS31, AS33, and AS42.

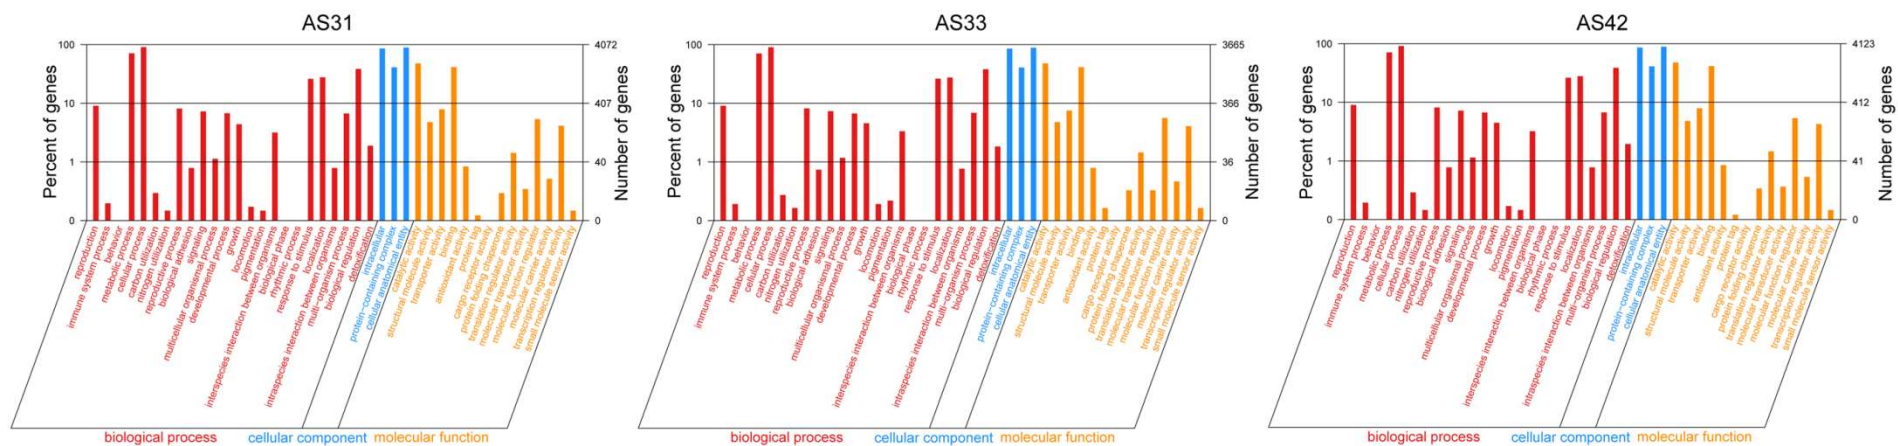

Figure S3. GO function classification of genes in the genomes of AS31, AS33, and AS42.

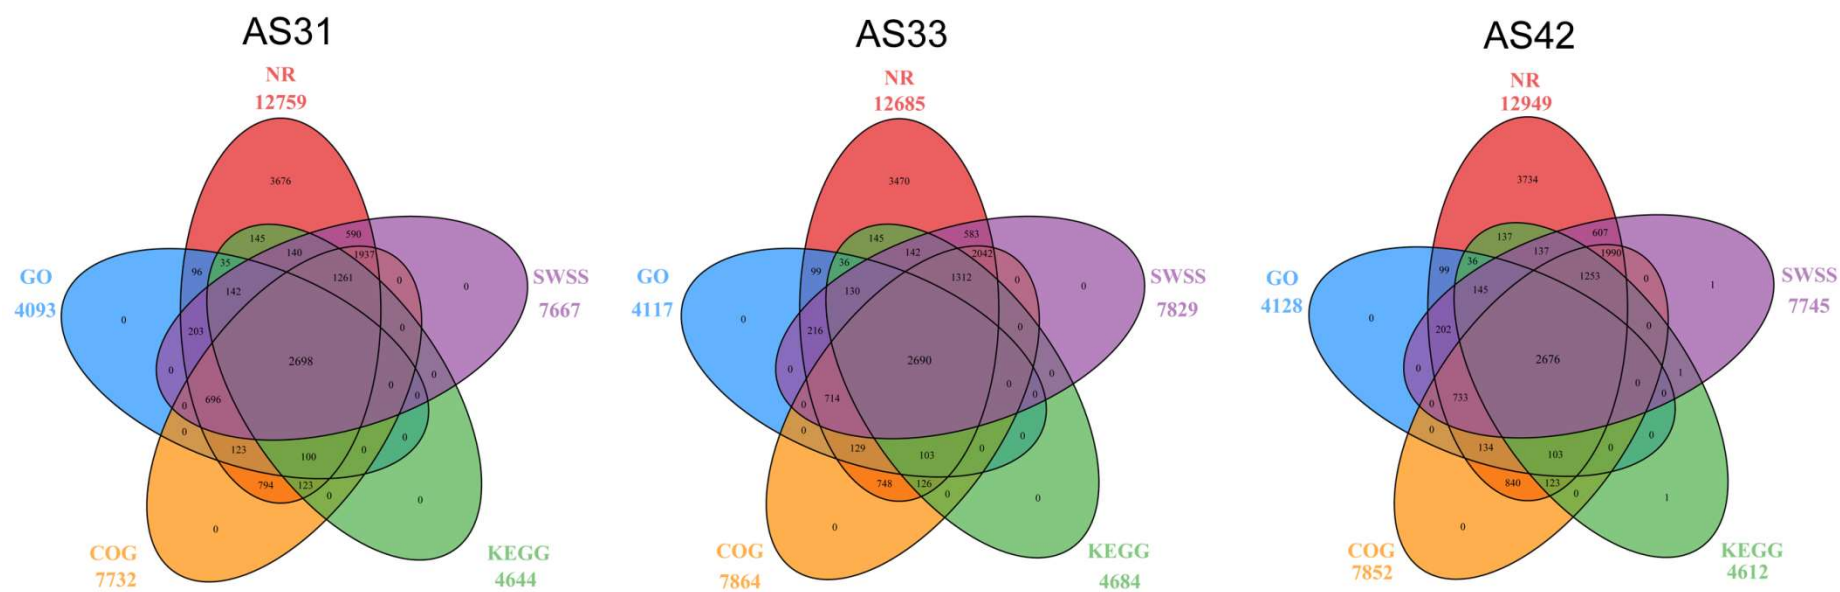

Figure S4. Venn diagrams showing the annotated genes in the genomes of AS31, AS33, and AS42 based on databases including NR, Swissport, COG, GO and KEGG.

## Supplementary Tables

Table S1. Sequences of the primers used in qPCR.

| Primers   | Sequence (5'-3')            |
|-----------|-----------------------------|
| actin-F   | TTATGGTTGGGATGGGACA         |
| actin-R   | AGCACGGCTTGAATAGCG          |
| OsPT1-F   | CGCTTCCGTACGAGTGGTAGT       |
| OsPT1-R   | GGTTCTTTCAAATCCAGGGAAA      |
| OsPT2-F   | GACGAGACCGCCCAAGAAG         |
| OsPT2-R   | TTTTCAGTCACTCACGTCGAGAC     |
| OsPT4-F   | TATTGCGGCTTAGATTGCATTAG     |
| OsPT4-R   | TCCAAATCAAATGGGCACTAAG      |
| OsPT5-F   | TGCTACTGCCCATGACTAGGATT     |
| OsPT5-R   | CCATAGAAGAGATCCAGAGAAGCTGTA |
| OsPT6-F   | TATAACTGATCGATCGAGACCAGAG   |
| OsPT6-R   | TGGATAGCCAGGCCAGTTATATATC   |
| OsPT7-F   | GCAAGTCGCTCGAGGAGATG        |
| OsPT7-R   | TGGAATTAACGGGTGGATCAC       |
| OsPT8-F   | AGAAGGCAAAAGAAATGTGTGTTAAAT |
| OsPT8-R   | AAAATGTATTTCGTGCCAAATTGCT   |
| OsPT9-F   | CATAGGCTTGTCTATCCTTTGG      |
| OsPT9-R   | CACTGTAAATAAATCCGCGTTTC     |
| OsPT10-F  | GAGCTCGCACCTCAGCAT          |
| OsPT10-R  | GAGTTCACTCACACGGAGACC       |
| OsIPS1-F  | AAGGGCAGGGCACACTCCACATTA    |
| OsIPS1-R  | ATTAGAGCAAGGACCGAAACACA     |
| OsSPX1-F  | CTGAAAACGGTAATGGATAGG       |
| OsSPX1-R  | AACAACAACAGCACGAGC          |
| OsPAP9b-F | ACCTACGATAACAGCAACTACGC     |
| OsPAP9b-R | CATATCAGTTTTTCGTCGCATGTA    |
| OsPT11-F  | CATATCCCAGATGAGCGTATCATG    |
| OsPT11-R  | GAGAAGTTCCCTGCTTCAAGCA      |
| OsPT13-F  | CTTCTCCATCTCCCTTGTCG        |
| OsPT13-R  | TTTTGTGCGCTAGCCAGCC         |

Table S2. The expression of Pi transport-related genes in roots and shoots of rice at 7 and 14 days after inoculation with strains AS31, AS33, or AS42. The gene expression (Ct value) was obtained by qRT-PCR.

|                   | $\beta$ -actin | PT1         | PT2         | PT4         | PT5         | PT6         | PT7         | PT8         | PT9         | PT10        | IPS1        | SPX1        | PAP9b       | PT11        | PT13        |
|-------------------|----------------|-------------|-------------|-------------|-------------|-------------|-------------|-------------|-------------|-------------|-------------|-------------|-------------|-------------|-------------|
| Root-CK-7days     | 33.10±0.045    | 31.49±0.39  | 33.54±0.094 | 30.89±0.68  | 33.93±0.61  | 37.02±0.11  | 36.89±0.42  | 27.71±0.41  | 33.87±0.069 | 36.84±0.55  | 33.30±0.26  | 32.18±0.43  | 32.64±0.46  | 35.74±0.012 | 35.83±0.70  |
| Shoot-CK-7days    | 26.74±0.34     | 22.68±0.28  | 29.39±0.83  | 33.08±0.65  | 28.78±0.60  | 35.41±0.86  | 35.12±0.36  | 23.18±0.38  | 35.71±0.45  | 33.22±0.46  | 25.63±0.69  | 23.12±0.18  | 25.81±0.53  | 32.72±0.67  | 34.70±0.16  |
| Root-AS31-7days   | 33.22±0.54     | 29.02±0.060 | 29.81±0.41  | 29.08±0.59  | 35.44±0.25  | 35.53±0.31  | 38.574±0.42 | 29.21±0.38  | 36.45±0.16  | 34.61±0.14  | 36.19±0.27  | 34.73±0.28  | 35.20±0.047 | 37.09±0.033 | 35.45±0.23  |
| Shoot-AS31-7days  | 26.46±0.25     | 21.43±0.19  | 28.18±0.42  | 33.90±0.45  | 28.11±0.11  | 37.13±0.057 | 36.49±0.074 | 25.03±0.090 | 35.24±0.17  | 34.71±0.49  | 29.27±0.002 | 25.00±0.83  | 29.54±0.29  | 35.64±0.046 | 37.08±0.043 |
| Root-AS33-7days   | 33.86±0.36     | 29.41±0.34  | 34.00±0.35  | 33.18±0.41  | 35.04±0.062 | 34.67±0.56  | 34.51±0.54  | 27.81±0.29  | 36.11±0.076 | 30.21±0.19  | 31.06±0.35  | 29.28±0.13  | 35.83±0.20  | 27.68±0.036 | 34.72±0.19  |
| Shoot-AS33-7days  | 26.28±0.50     | 20.98±0.14  | 24.09±0.22  | 33.91±0.005 | 27.78±0.27  | 37.07±0.068 | 35.84±0.63  | 24.50±0.74  | 33.15±0.59  | 34.23±0.25  | 25.23±0.058 | 26.09±0.016 | 28.14±0.48  | 34.91±0.41  | 35.54±0.026 |
| Root-AS42-7days   | 34.55±0.52     | 31.29±0.14  | 33.96±0.39  | 34.06±0.16  | 36.99±0.003 | 36.93±0.21  | 35.96±0.15  | 31.25±0.20  | 36.88±0.25  | 35.38±0.29  | 33.51±0.66  | 32.37±0.25  | 35.52±0.65  | 27.99±0.45  | 35.08±0.26  |
| Shoot-AS42-7days  | 27.96±0.57     | 25.02±0.021 | 30.30±0.087 | 34.50±0.13  | 30.63±0.37  | 36.86±0.42  | 36.52±0.20  | 27.73±0.72  | 36.10±0.077 | 35.38±0.20  | 27.79±0.56  | 27.69±0.28  | 29.45±0.097 | 36.20±0.18  | 36.66±0.10  |
| Root-CK-14days    | 15.64±0.27     | 11.71±0.30  | 17.75±0.035 | 15.76±0.20  | 15.47±0.52  | 21.44±0.28  | 18.14±0.36  | 11.96±0.47  | 19.63±0.38  | 18.93±0.069 | 18.10±0.07  | 16.89±0.20  | 16.06±0.042 | 19.57±0.34  | 19.80±0.13  |
| Shoot-CK-14days   | 18.87±0.016    | 16.20±0.34  | 19.92±0.016 | 20.10±0.38  | 20.96±0.47  | 21.44±0.075 | 20.25±0.47  | 17.18±0.46  | 23.36±0.43  | 21.41±0.38  | 22.59±0.012 | 21.61±0.61  | 20.02±0.37  | 24.93±0.007 | 21.93±0.36  |
| Root-AS31-14days  | 28.64±0.20     | 24.15±0.25  | 31.21±0.008 | 24.43±0.071 | 28.43±0.13  | 34.92±0.47  | 33.31±0.35  | 23.99±0.23  | 31.40±0.45  | 32.52±0.14  | 29.52±0.31  | 30.53±0.27  | 28.63±0.44  | 33.49±0.42  | 32.70±0.26  |
| Shoot-AS31-14days | 30.86±0.57     | 26.18±0.18  | 34.70±0.031 | 31.68±0.086 | 32.13±0.14  | 35.01±0.37  | 33.89±0.039 | 26.64±0.24  | 34.87±0.37  | 33.77±0.24  | 33.42±0.19  | 32.12±0.043 | 30.30±0.097 | 35.14±0.41  | 34.46±0.016 |
| Root-AS33-14days  | 27.25±0.16     | 23.18±0.17  | 28.59±0.39  | 28.27±0.25  | 28.35±0.37  | 31.82±0.40  | 33.02±0.31  | 23.48±0.40  | 28.73±0.06  | 32.47±0.62  | 28.86±0.081 | 29.15±0.022 | 28.03±0.13  | 34.67±0.28  | 32.37±0.42  |
| Shoot-AS33-14days | 29.23±0.043    | 23.63±0.11  | 31.23±0.46  | 31.08±0.17  | 31.29±0.59  | 35.79±0.37  | 33.80±0.062 | 27.16±0.11  | 37.10±0.49  | 33.73±0.25  | 31.26±0.053 | 28.78±0.48  | 28.22±0.47  | 36.38±0.071 | 34.12±0.46  |
| Root-AS42-14days  | 30.98±0.37     | 25.12±0.22  | 31.65±0.35  | 31.45±0.13  | 33.69±0.54  | 32.88±0.001 | 32.38±0.25  | 27.38±0.14  | 32.81±0.47  | 31.15±0.14  | 32.30±0.064 | 30.50±0.033 | 31.75±0.45  | 36.71±0.079 | 33.56±0.16  |
| Shoot-AS42-14days | 34.66±0.48     | 25.23±0.041 | 35.39±0.46  | 32.98±0.32  | 35.04±0.26  | 35.61±0.053 | 35.02±0.50  | 27.81±0.13  | 38.65±0.52  | 35.47±0.044 | 33.26±0.044 | 33.55±0.22  | 32.46±0.093 | 38.79±0.41  | 33.88±0.49  |

Table S3. Statistics of genome assemblies of selected *Aspergillus* strains used in this study.

| Strains                                    | BioProjects  | Number of Scaffolds | N50 (bp) | Total length (Mb) | Protein counts | GC (%) |
|--------------------------------------------|--------------|---------------------|----------|-------------------|----------------|--------|
| <i>Aspergillus sydowii</i> CBS 593.65      | PRJNA721994  | 97                  | 123783   | 34.4              | 13579          | 50.0   |
| <i>Aspergillus versicolor</i> CBS 583.65   | PRJNA721993  | 51                  | 695,565  | 33.1              | 13222          | 50.1   |
| <i>Aspergillus awamori</i>                 | PRJDB4986    | 33                  | 4298649  | 38.6              | 11224          | 49.3   |
| AS31                                       | PRJNA 757213 | 538                 | 246959   | 36.8              | 12,933         | 49.9   |
| AS33                                       | PRJNA 757213 | 812                 | 284941   | 34.8              | 12,898         | 49.6   |
| AS42                                       | PRJNA 757213 | 836                 | 76567    | 35.3              | 13,211         | 50.6   |
| <i>Aspergillus nidulans</i> FGSC A4        | PRJNA13961   | 91                  | 282268   | 30.3              | 9556           | 50.3   |
| <i>Aspergillus ochraceoroseus</i> SRRC1432 | PRJNA275128  | 3590                | 21535    | 24.3              | 7829           | 48.2   |
| <i>Aspergillus tubingensis</i> WU-2223L    | PRJNA645154  | 15                  | 3153774  | 35.0              | 11477          | 49.3   |
| <i>Aspergillus puulaauensis</i> MK2        | PRJNA728012  | 8                   | 4388637  | 34.3              | 13620          | 49.754 |

Table S4. Numbers of secondary metabolism gene clusters in genomes of AS31, AS33, and AS42.

| Strains                                    | NRPS | T1PKS | T3PKS | terpene | fungal-RiPP | betalactone | indole | siderophore | NAPAA | Total |
|--------------------------------------------|------|-------|-------|---------|-------------|-------------|--------|-------------|-------|-------|
| <i>Aspergillus sydowii</i> CBS 593.65      | 23   | 20    | 0     | 9       | 1           | 3           | 6      | 0           | 0     | 56    |
| AS31                                       | 28   | 21    | 0     | 10      | 1           | 3           | 7      | 0           | 0     | 60    |
| AS33                                       | 34   | 23    | 0     | 11      | 1           | 3           | 8      | 0           | 0     | 68    |
| AS42                                       | 27   | 18    | 0     | 10      | 1           | 3           | 7      | 0           | 0     | 58    |
| <i>Aspergillus versicolor</i> CBS 583.65   | 23   | 15    | 0     | 6       | 0           | 3           | 4      | 0           | 0     | 43    |
| <i>Aspergillus awamori</i>                 | 39   | 30    | 1     | 7       | 0           | 1           | 2      | 0           | 0     | 70    |
| <i>Aspergillus nidulans</i> FGSC A4        | 24   | 22    | 0     | 9       | 0           | 3           | 4      | 0           | 0     | 55    |
| <i>Aspergillus ochraceoroseus</i> SRRC1432 | 13   | 13    | 0     | 6       | 0           | 1           | 4      | 0           | 0     | 34    |
| <i>Aspergillus tubingensis</i> WU-2223L    | 39   | 38    | 1     | 21      | 0           | 1           | 2      | 2           | 0     | 83    |
| <i>Aspergillus puulaauensis</i> MK2        | 33   | 25    | 0     | 11      | 0           | 2           | 8      | 0           | 1     | 67    |



Table S5. Secondary metabolite gene clusters of AS31.

| Cluster   | Region      | Type                 | Location        | Most similar known cluster        | Similarity |
|-----------|-------------|----------------------|-----------------|-----------------------------------|------------|
| cluster1  | Region 1.1  | fungai-RiPP          | 10,736-45,020   | unknown                           |            |
|           | Region 1.2  | indole               | 106,415-127,722 | unknown                           |            |
|           | Region 1.3  | T1PKS                | 538,544-585,245 | naphthopyrone                     | 100%       |
|           | Region 1.4  | terpene              | 706,380-728,735 | clavatic acid                     | 100%       |
| cluster4  | Region 4.1  | NRPS-like            | 161,194-204,016 | unknown                           |            |
| cluster6  | Region 6.1  | T1PKS                | 37,472-83,035   | neosartorin                       | 36%        |
| cluster7  | Region 7.1  | NRPS-like            | 171,628-207,102 | unknown                           |            |
|           | Region 7.2  | NRPS                 | 374,347-428,667 | unknown                           |            |
| cluster8  | Region 8.1  | NRPS-like            | 81,035-125,551  | unknown                           |            |
| cluster9  | Region 9.1  | T1PKS                | 25,621-72,939   | 4-epi-15-epi-brefeldin A          | 20%        |
| cluster10 | Region 10.1 | terpene              | 416,122-437,706 | squalestatin S1                   | 80%        |
|           | Region 10.2 | T1PKS                | 440,145-470,244 | unknown                           |            |
| cluster11 | Region 11.1 | T1PKS                | 154,467-202,345 | fusaridione A                     | 12%        |
| cluster13 | Region 13.1 | terpene              | 119,573-140,630 | unknown                           |            |
| cluster15 | Region 15.1 | NRPS                 | 217,956-266,666 | penicillin                        | 18%        |
|           | Region 15.2 | NRPS                 | 285,972-330,066 | unknown                           |            |
| cluster16 | Region 16.1 | terpene              | 30,219-51,181   | unknown                           |            |
|           | Region 16.2 | NRPS-like,T1PKS,NRPS | 146,463-238,685 | leucinostatin A / leucinostatin B | 10%        |
| cluster18 | Region 18.1 | NRPS-like            | 170,998-214,287 | burnettramic acid A               | 22%        |
| cluster22 | Region 22.1 | NRPS-like            | 316,175-354,441 | unknown                           |            |
| cluster23 | Region 23.1 | terpene              | 80,087-102,135  | unknown                           |            |
| cluster25 | Region 25.1 | T1PKS,terpene        | 291,960-329,950 | shearinine D                      | 9%         |
| cluster30 | Region 30.1 | T1PKS                | 193,949-239,515 | asperthecin                       | 100%       |
| cluster33 | Region 33.1 | indole               | 150,050-171,428 | unknown                           |            |
| cluster34 | Region 34.1 | NRPS                 | 33,753-86,067   | fellutamide B                     | 100%       |
| cluster38 | Region 38.1 | T1PKS                | 107,129-154,242 | unknown                           |            |
|           | Region 38.2 | T1PKS                | 234,143-267,505 | F9775A / F9775B / orsellinic acid | 60%        |
| cluster41 | Region 41.1 | T1PKS,NRPS-like      | 51,960-106,698  | yanuthone D                       | 20%        |
| cluster45 | Region 45.1 | NRPS                 | 52,849-107,051  | unknown                           |            |
|           | Region 45.2 | indole               | 212,733-234,099 | unknown                           |            |
| cluster47 | Region 47.1 | T1PKS                | 110,103-157,857 | unknown                           |            |
| cluster48 | Region 48.1 | NRPS,betalactone     | 151,907-197,043 | unknown                           |            |
| cluster49 | Region 49.1 | NRPS-like,indole     | 201,771-228,220 | ochrindole A                      | 29%        |
| cluster52 | Region 52.1 | NRPS-like            | 163,731-207,000 | unknown                           |            |
| cluster54 | Region 54.1 | NRPS-like            | 82,641-125,921  | unknown                           |            |
| cluster57 | Region 57.1 | NRPS                 | 65,420-124,473  | nidulanin A                       | 75%        |
| cluster61 | Region 61.1 | T1PKS,NRPS           | 69,384-121,526  | pyranonigrin E                    | 100%       |

|            |              |                   |                 |                 |      |
|------------|--------------|-------------------|-----------------|-----------------|------|
| cluster62  | Region 62.1  | terpene           | 90,331-112,3377 | unknown         |      |
|            | Region 62.2  | T1PKS,indole      | 159,109-196,515 | neosartoricin B | 60%  |
| cluster65  | Region 65.1  | NRPS-like         | 139,759-184,646 | unknown         |      |
| cluster74  | Region 74.1  | terpene           | 1-14,271        | unknown         |      |
| cluster79  | Region 79.1  | terpene           | 44,807-65,919   | unknown         |      |
| cluster81  | Region 81.1  | NRPS-like         | 114,978-156,127 | unknown         |      |
| cluster84  | Region 84.1  | NRPS              | 26,003-73,316   | unknown         |      |
| cluster89  | Region 89.1  | NRPS,T1PKS        | 64,819-135,028  | unknown         |      |
| cluster90  | Region 90.1  | NRPS              | 28,910-76,575   | unknown         |      |
| cluster91  | Region 91.1  | T1PKS             | 95,328-133,961  | neosartorin     | 31%  |
| cluster93  | Region 93.1  | NRPS,T1PKS        | 1-41,591        | equisetin       | 54%  |
| cluster96  | Region 96.1  | T1PKS             | 1-37,693        | asperfuranone   | 18%  |
| cluster97  | Region 97.1  | indole            | 82,454-103,656  | unknown         |      |
| cluster98  | Region 98.1  | terpene,NRPS-like | 67,218-118,691  | clavaric acid   | 100% |
| cluster101 | Region 101.1 | indole            | 23,998-45,431   | unknown         |      |
| cluster113 | Region 113.1 | betalactone       | 36,569-67,108   | unknown         |      |
| cluster126 | Region 126.1 | betalactone       | 16,258-40,236   | unknown         |      |
| cluster130 | Region 130.1 | NRPS              | 1-23,896        | unknown         |      |
| cluster154 | Region 154.1 | T1PKS             | 27,679-61,601   | unknown         |      |
| cluster157 | Region 157.1 | NRPS              | 1-50,534        | nidulanin A     | 50%  |
| cluster158 | Region 158.1 | T1PKS             | 1-39,626        | unknown         |      |
| cluster161 | Region 161.1 | NRPS-like         | 28,617-55,428   | unknown         |      |
| cluster181 | Region 181.1 | T1PKS             | 1-37,835        | unknown         |      |

Table S6. Secondary metabolite gene clusters of AS33.

| Cluster   | Region      | Type              | Location        | Most similar known cluster                 | Similarity |
|-----------|-------------|-------------------|-----------------|--------------------------------------------|------------|
| cluster1  | Region 1.1  | T1PKS             | 136,958-180,054 | unknown                                    |            |
|           | Region 1.2  | terpene           | 344,848-365,958 | unknown                                    |            |
|           | Region 1.3  | NRPS,indole       | 470,547-517,263 | notoamide A                                | 66%        |
|           | Region 1.4  | T1PKS             | 678,772-727,593 | unknown                                    |            |
| cluster2  | Region 2.1  | terpene,NRPS-like | 561,618-613,189 | clavatic acid                              | 100%       |
| cluster3  | Region 3.1  | T1PKS             | 70,151-115,767  | neosartorin                                | 36%        |
|           | Region 3.2  | terpene           | 418,308-439,499 | unknown                                    |            |
| cluster4  | Region 4.1  | NRPS              | 260,937-313,249 | fellutamide B                              | 100%       |
| cluster5  | Region 5.1  | betalactone       | 64,969-94839    | unknown                                    |            |
| cluster6  | Region 6.1  | NRPS-like         | 203,183-247,674 | unknown                                    |            |
| cluster7  | Region 7.1  | NRPS,T1PKS        | 43,955-134,293  | sterigmatocystin                           | 65%        |
|           | Region 7.2  | indole            | 254,454-275,793 | unknown                                    |            |
| cluster9  | Region 9.1  | NRPS              | 153,720-203,535 | unknown                                    |            |
| cluster10 | Region 10.1 | T1PKS,NRPS        | 368,831-413,643 | pyranonigrin E                             | 100%       |
| cluster11 | Region 11.1 | NRPS-like,T1PKS   | 1-55,256        | unknown                                    |            |
|           | Region 11.2 | T1PKS             | 303,715-351,802 | unknown                                    |            |
| cluster13 | Region 13.1 | terpene           | 197,585-219,171 | squalestatin S1                            | 80%        |
|           | Region 13.2 | T1PKS             | 22,1647-269,298 | unknown                                    |            |
| cluster14 | Region 14.1 | NRPS              | 53,856-109,944  | unknown                                    |            |
| cluster15 | Region 15.1 | T1PKS             | 33,227-90,743   | chaetoviridin E /<br>11-epichaetomugilin A | 11%        |
| cluster18 | Region 18.1 | NRPS              | 92,119-140,659  | penigequinolone A                          | 21%        |
| cluster21 | Region 21.1 | T1PKS             | 127,614-173,181 | asperthecin                                | 100%       |
| cluster22 | Region 22.1 | NRPS              | 253,925-312,973 | nidulanin A                                | 75%        |
| cluster23 | Region 23.1 | NRPS-like,indole  | 78,217-121,108  | ochrindole A                               | 29%        |
| cluster24 | Region 24.1 | NRPS              | 229,404-28,679  | cyclo-(D-Phe-L-Phe-D-Val-L-Val)            | 100%       |
| cluster25 | Region 25.1 | T1PKS             | 108,305-155,812 | neurosporin A                              | 26%        |
| cluster28 | Region 28.1 | T1PKS             | 64,443-111,370  | naphthopyrone                              | 100%       |
| cluster30 | Region 30.1 | NRPS-like         | 1-30,186        | unknown                                    |            |
| cluster31 | Region 31.1 | NRPS-like         | 45,718-90,602   | unknown                                    |            |
| cluster34 | Region 34.1 | betalactone       | 72,138-96,121   | unknown                                    |            |
|           | Region 34.2 | NRPS,NRPS-like    | 100,504-183,552 | unknown                                    |            |
| cluster37 | Region 37.1 | T1PKS,terpene     | 1-38,199        | shearinine D                               | 9%         |
| cluster41 | Region 41.1 | indole            | 151,788-173,182 | unknown                                    |            |
| cluster42 | Region 42.1 | NRPS,betalactone  | 116,158-161,288 | unknown                                    |            |
| cluster43 | Region 43.1 | indole            | 168,615-189,989 | unknown                                    |            |
|           | Region 43.2 | NRPS-like         | 232,938-266,294 | unknown                                    |            |
| cluster45 | Region 45.1 | terpene           | 128,622-149,584 | unknown                                    |            |
| cluster46 | Region 46.1 | T1PKS             | 101,804-149,818 | unknown                                    |            |
|           | Region 46.2 | terpene           | 236,993-254,079 | unknown                                    |            |

|            |              |                 |                 |                                                               |     |
|------------|--------------|-----------------|-----------------|---------------------------------------------------------------|-----|
| cluster47  | Region 47.1  | NRPS-like       | 189,258-232,565 | unknown                                                       |     |
| cluster48  | Region 48.1  | NRPS,terpene    | 89,959-133,635  | unknown                                                       |     |
|            | Region 48.2  | NRPS            | 193,476-246,043 | unknown                                                       |     |
| cluster49  | Region 49.1  | NRPS-like       | 6,305-49,346    | unknown                                                       |     |
| cluster51  | Region 51.1  | T1PKS           | 172,096-220,189 | ankaflavin / monascin /<br>rubropunctatine /<br>monascorubrin | 20% |
| cluster56  | Region 56.1  | NRPS            | 67,739-122,054  | unknown                                                       |     |
| cluster60  | Region 60.1  | NRPS,NRPS-like  | 1-72,089        | unknown                                                       |     |
| cluster63  | Region 63.1  | terpene         | 163,604-184,697 | unknown                                                       |     |
| cluster68  | Region 68.1  | terpene         | 138,943-160,077 | shearinine D                                                  | 13% |
| cluster73  | Region 73.1  | NRPS-like       | 41,739-85,070   | unknown                                                       |     |
| cluster76  | Region 76.1  | T1PKS           | 15,170-64,943   | unknown                                                       |     |
| cluster79  | Region 79.1  | NRPS-like       | 76,600-120,066  | unknown                                                       |     |
| cluster86  | Region 86.1  | NRPS,T1PKS      | 22,307-73,332   | asperfuranone                                                 | 18% |
| cluster93  | Region 93.1  | indole          | 119,160-140,600 | unknown                                                       |     |
| cluster96  | Region 96.1  | terpene         | 57,677-80,032   | unknown                                                       |     |
| cluster101 | Region 101.1 | fungal-RiPP     | 1-27,095        | unknown                                                       |     |
| cluster103 | Region 103.1 | NRPS-like       | 1-25,046        | unknown                                                       |     |
| cluster104 | Region 104.1 | NRPS-like       | 1-24,584        | unknown                                                       |     |
| cluster105 | Region 105.1 | T1PKS,NRPS-like | 20,621-75,269   | yanuthone D                                                   | 20% |
| cluster109 | Region 109.1 | indole          | 28,976-50,423   | unknown                                                       |     |
| cluster125 | Region 125.1 | NRPS            | 45,844-94,585   | unknown                                                       |     |
| cluster144 | Region 144.1 | NRPS            | 34,163-74,230   | unknown                                                       |     |
| cluster156 | Region 156.1 | T1PKS           | 1-33,857        | unknown                                                       |     |
| cluster164 | Region 164.1 | NRPS            | 1,282-52,405    | aspercryptins                                                 | 40% |
| cluster165 | Region 165.1 | T1PKS           | 1-32,651        | F9775A / F9775B / orsellinic<br>acid                          | 60% |
| cluster175 | Region 175.1 | indole          | 12,436-33,714   | unknown                                                       |     |
| cluster180 | Region 180.1 | T1PKS           | 1-37,437        | unknown                                                       |     |
| cluster201 | Region 201.1 | NRPS,T1PKS      | 1-29,623        | burnettramic acid A                                           | 88% |
| cluster208 | Region 208.1 | T1PKS           | 1-27,318        | pyripyropene A                                                | 33% |

Table S7. Secondary metabolite gene clusters of AS42.

| cluster    | Region       | Type                 | location        | Most similar known cluster        | Similarity |
|------------|--------------|----------------------|-----------------|-----------------------------------|------------|
| cluster1   | Region 1.1   | fungal-RiPP          | 59,154-93,438   | unknown                           |            |
|            | Region 1.2   | indole               | 154,944-176,251 | unknown                           |            |
| cluster2   | Region 2.1   | NRPS                 | 1-33,436        | unknown                           |            |
| cluster3   | Region 3.1   | NRPS                 | 174,627-221,940 | unknown                           |            |
| cluster5   | Region 5.1   | T1PKS                | 12,036-55,562   | unknown                           |            |
|            | Region 5.2   | NRPS,T1PKS           | 103,759-192,476 | unknown                           |            |
| cluster6   | Region 6.1   | NRPS,T1PKS           | 1-41,592        | equisetin                         | 54%        |
| cluster8   | Region 8.1   | NRPS,betalactone     | 39,486-84,622   | unknown                           |            |
| cluster9   | Region 9.1   | T1PKS,NRPS-like      | 127,241-181,979 | yanuthone D                       | 20%        |
| cluster11  | Region 11.1  | NRPS                 | 1-39,028        | unknown                           |            |
|            | Region 11.2  | indole               | 144,710-166,076 | unknown                           |            |
| cluster16  | Region 16.1  | indole               | 151,868-173,247 | unknown                           |            |
| cluster24  | Region 24.1  | terpene              | 105,705-126,817 | unknown                           |            |
| cluster25  | Region 25.1  | NRPS-like            | 5,378-48,290    | unknown                           |            |
| cluster26  | Region 26.1  | NRPS-like            | 46,238-90,754   | unknown                           |            |
| cluster29  | Region 29.1  | NRPS-like            | 123,451-161,630 | unknown                           |            |
| cluster38  | Region 38.1  | T1PKS                | 43,150-88,713   | neosartorin                       | 36%        |
| cluster41  | Region 41.1  | NRPS-like            | 48,582-93,469   | unknown                           |            |
| cluster42  | Region 42.1  | terpene,T1PKS        | 70,675-116,504  | shearinine D                      | 9%         |
| cluster48  | Region 48.1  | T1PKS                | 48,151-96,029   | fusaridione A                     | 12%        |
| cluster49  | Region 49.1  | T1PKS                | 74,253-119,757  | neosartorin                       | 42%        |
| cluster50  | Region 50.1  | T1PKS                | 1-46,098        | naphthopyrone                     | 100%       |
| cluster54  | Region 54.1  | T1PKS                | 1-29,498        | unknown                           |            |
| cluster58  | Region 58.1  | indole               | 12,710-34,143   | unknown                           |            |
| cluster69  | Region 69.1  | NRPS                 | 28,471-79,753   | penicillin                        | 18%        |
| cluster81  | Region 81.1  | NRPS                 | 60,816-103,996  | fellutamide B                     | 100%       |
| cluster90  | Region 90.1  | NRPS,T1PKS,NRPS-like | 17,047-96,458   | leucinostatin A / leucinostatin B | 10%        |
| cluster96  | Region 96.1  | T1PKS                | 21,875-67,441   | asperthecin                       | 100%       |
| cluster98  | Region 98.1  | terpene              | 69,645-91,682   | unknown                           |            |
| cluster100 | Region 100.1 | indole               | 1-14,567        | unknown                           |            |
|            | Region 100.2 | NRPS-like            | 56,548-90,019   | unknown                           |            |
| cluster106 | Region 106.1 | NRPS                 | 45,099-89,098   | unknown                           |            |
| cluster107 | Region 107.1 | terpene              | 17,628-39,634   | unknown                           |            |
| cluster117 | Region 117.1 | T1PKS                | 49,327-82,973   | F9775A / F9775B / orsellinic acid | 60%        |
| cluster120 | Region 120.1 | NRPS-like            | 1-41,941        | unknown                           |            |
| cluster123 | Region 123.1 | T1PKS,indole         | 7,612-53,161    | neosartoricin B                   | 60%        |
| cluster126 | Region 126.1 | NRPS                 | 43,210-78,659   | unknown                           |            |
| cluster142 | Region 142.1 | betalactone          | 31,751-62,290   | unknown                           |            |
| cluster163 | Region 163.1 | NRPS-like            | 1-38,268        | unknown                           |            |
| cluster178 | Region 178.1 | betalactone          | 43,576-66,679   | unknown                           |            |

|            |              |                   |               |                                 |      |
|------------|--------------|-------------------|---------------|---------------------------------|------|
| cluster180 | Region 180.1 | NRPS-like         | 28,232-66,206 | unknown                         |      |
| cluster186 | Region 186.1 | NRPS-like         | 24,053-64,395 | unknown                         |      |
| cluster217 | Region 217.1 | terpene           | 8,068-30,423  | clavaric acid                   | 100% |
| cluster226 | Region 226.1 | T1PKS             | 28,459-56,069 | unknown                         |      |
| cluster248 | Region 248.1 | NRPS-like         | 27,681-49,936 | unknown                         |      |
| cluster305 | Region 305.1 | T1PKS             | 1-39,998      | unknown                         |      |
| cluster311 | Region 311.1 | NRPS-like,terpene | 1-39,251      | clavaric acid                   | 100% |
| cluster317 | Region 317.1 | terpene           | 1-12,755      | unknown                         |      |
| cluster345 | Region 345.1 | indole            | 22,767-34,159 | terrequinone A                  | 80%  |
| cluster347 | Region 347.1 | T1PKS             | 1-26,867      | pyranonigrin E                  | 100% |
| cluster368 | Region 368.1 | NRPS-like         | 7,324-31,106  | unknown                         |      |
| cluster428 | Region 428.1 | NRPS              | 1-23,715      | nidulanin A                     | 50%  |
| cluster440 | Region 440.1 | NRPS              | 1-22,472      | cyclo-(D-Phe-L-Phe-D-Val-L-Val) | 100% |
| cluster488 | Region 488.1 | terpene           | 1-16,530      | unknown                         |      |
| cluster504 | Region 504.1 | terpene           | 694-15,942    | squalestatin S1                 | 80%  |
| cluster522 | Region 522.1 | NRPS              | 1-14,562      | nidulanin A                     | 50%  |
| cluster569 | Region 569.1 | T1PKS             | 1-11,499      | unknown                         |      |
| cluster672 | Region 672.1 | terpene           | 1-6,210       | unknown                         |      |
